# Supplementary material for: Host-parasite co-metabolic activation of antitrypanosomal aminomethyl-benzoxaboroles
Source: PubMed Central journal article supplement (PMC5823473; doi:10.1371/journal.ppat.1006850), 2018-02-09

Tb927.10.3210 . . . . . MLRRTL PFAFAFKSPPAVNERMDSFQPGSD . . . . . SAR.GTLEACKRL 43  
Tb927.10.6190 . . . . . MRKTRLLSRVFDLSN . . . . . AEAFRSGR . . . . . VLNQPTSFINGCF.V 39  
Tb927.6.4210 MEGVSALLDPFSGGGLCCCLFFFLFLESKFGLLHALYTSLLH . . . . . AKDRYYAPHISVPPPQVKFDNQ PST . . . . . QPLT.P 71  
TbALDH3  
HsALDH3B1  
HsALDH3B2  
HsALDH3A2  
HsALDH3A1

TbALDH3A2 secondary structure

Tb927.10.3210 RCGATDCPIVIGGKEYRTDNA INRMIPSSHQQQVAKGYNATPEL A Q K A I D T A L G A A K E W S Q M P F K D R A A I F L H A A H L 120  
Tb927.10.6190 TSGAADV . . . I S V E D . . . . . P . C T N V T I G D I P N L G K D E T L Q A I A V A Q K A F E T W K D T V P R T R A V I L H R W A Q L 101  
Tb927.6.4210 RAGPPGT . . . I C C Y D . . . . . K . G T N T Q I G L V T V N S P A E V Q E A V A R A R V A Q R E W A K T S F S T R R Q L L Y S L M E Y 133  
TbALDH3 . . . . . M P A G V P E N T S L E N I P V I V S K C R E A F N D D A N R D L K K R K Q V L R S L L N L 49  
HsALDH3B1 . . . . . M D P L G D T L R R L R E A F H A G R T R P A E F R A A Q L Q G L G R F 36  
HsALDH3B2  
HsALDH3A2 . . . . . M E L E V R R V R Q A F L S G R S R P L R F R L Q Q L E A L R R M 33  
HsALDH3A1 . . . . . M S K I S E A V K R A R A A F S S G R T R P L Q F R I Q Q L E A L Q R L 36

HsALDH3A2 secondary structure

Tb927.10.3210 I S T K Y R H E L R A A T M L G Q S K N P F Q A E I D V I A E S C D F L R F S V K Y A E E L Y N Q Q P I S P A S G . . P V W N A L D Y R P L E G F V S V I 195  
Tb927.10.6190 I Y H H . R N S L G S L L S R E S G K V V Q E G V D . E C L Y A A R F L E W Y A G E A E R A Y G D V V . . . G S P R P D V S T T V L R R P . V G V V G A I 172  
Tb927.6.4210 I L E N . Q A L I C E T T S V E C G K T M M D G S L G E I L T T L E K L R W T A A H G E E A L A E E V R D V G L I T F H K R A A V N Y V P . F G V M G A I 208  
TbALDH3 . . . . . V E E N . T D E F C K A I H R D R R R H R D E T V V M E I L P L R N E V W H L I E H M D E Y V K P V K P T M E G A A A L D D C E L Q Y E P . L G V V L V I 124  
HsALDH3B1 . . . . . L Q E N . K Q L L H D A L A Q D L H K S A F E S E V S E V A I S Q G E V T L A L R N L R A W M K D E R V P K N L A T Q L D S A F I R K E P . F G L V L I I 111  
HsALDH3B2 . . . . . V Q E R . E K D I L T A I A A D L K K S E F N V Y S Q E V I T V L G E I D F M L E N L P E W V T A K P R S T N L F M K L D S V F I W K E P . F G L V L I I 30  
HsALDH3A2 . . . . . I Q E Q . E Q E L V G A L A A D L H K N E W N A Y Y E E V V Y V L E E I E Y M I Q K L P E W A A D E P V E K T P Q T Q Q D E L Y I H S E P . L G V V L V I 108  
HsALDH3A1 . . . . . I Q E Q . E Q E L V G A L A A D L H K N E W N A Y Y E E V V Y V L E E I E Y M I Q K L P E W A A D E P V E K T P Q T Q Q D E L Y I H S E P . L G V V L V I 111

Tb927.10.3210 A P F N F S A I A A N L . V A C P A L M G N V I L W K P S P N A V L S N Y L L Y K V F E E A G L P A . . . G V V N F M P C E P K V M T E V V N S H P E L 267  
Tb927.10.6190 T P W N F P S A M V T R V V G G A L A A G C A V V L K P S E L T P F S A L A L A Q L A V E A G V P D . . . G V F N I V T G N A A P I G D A V L D S F D V 245  
Tb927.6.4210 V S W N Y P F H N I Y G P M T S A L F A G N A F V G K I S E Y S S Y Y A S Y Y L S I V Q E . G I K E L G Y S P H L V S F V V G F A E T G E A L V N S V D . 283  
TbALDH3 . . . . . G T W N Y P L L L I L Q P L L G A L A A G N T A V I K P S E L A P A T A E L L T K L L P K . Y V S S . . . D V V G I V N G G V S E T T A V L K E R F D . 195  
HsALDH3B1 . . . . . A P W N Y P L N L T L V P L V G A L A A G N C V L K P S E I S K N V E K I L A E V L P Q . Y V D Q . . . S C F A V V L G G P Q E T G Q L L E H R F D . 182  
HsALDH3B2 . . . . . A P W N Y P L N L T L V L V G A L A A G S C V L K P S E I S Q G T E K V L A E V L P Q . Y L D Q . . . S C F A V V L G G P Q E T G Q L L E H K L D . 101  
HsALDH3A2 . . . . . G A W N Y P F V L T I Q P L I G A I A A G N A V I K P S E L S E N T A K I L A K L L P Q . Y L D Q . . . D L Y I V I N G G V E E T T E L L K Q R F D . 179  
HsALDH3A1 . . . . . G T W N Y P F N L T I Q P M V G A I A A G N S V V L K P S E L S E N M A S L L A T I P Q . Y L D K . . . D L Y P V I N G G V P E T T E L L K E R F D . 182

Tb927.10.3210 A G V A F T G S T N V F L S I N K Q I Y S R L E E Y R N I P R I S G E T G G K D F H L I H P T A D M . . K M T A A L T V R G A F E Y Q G Q K C S A T S R I 342  
Tb927.10.6190 R K I S F T G S T R V G K Y I Y R R . . . S A S T M K K L G L E L G G N A P F I V F S D A E V . . . D R A V T G L M N A K F R A A G Q A C T S A N R V 314  
Tb927.6.4210 . K L T F T G S P A V G K I V M R S . . . . . A A Q T L T P V V L E L G G K D P A I V C D D A D L . . E H V V P I I M R G T F Q N C G Q N C V G L E R V 351  
TbALDH3 . . . . . H I L Y T G S A R V A E I V M A . . . . . A A K H L T P V T L E L G G K S P V Y V D D T C A D N M K V V A E R I M W G K I N A G Q T C I A P D Y V 265  
HsALDH3B1 . . . . . Y I F F T G S P R V G K I V M T A . . . . . A A K H L T P V T L E L G G K N P C Y V D D N C D P . . Q T V A N R V A W F R Y F N A G Q T C V A P D Y V 250  
HsALDH3B2 . . . . . Y I F F T G S P R V G K I V M T A . . . . . A A K H L T P V T L E L G G K N P C Y V D D N C D P . . Q T V A N R V A W F C Y F N A G Q T C V A P D Y V 169  
HsALDH3A2 . . . . . H I F Y T G N T A V G K I V M E A . . . . . A A K H L T P V T L E L G G K S P C Y I D K D C D L . . D I V C R R I T W G K Y M N C G Q T C I A P D Y I 247  
HsALDH3A1 . . . . . H I L Y T G S T G V G K I I M T A . . . . . A A K H L T P V T L E L G G K S P C Y I V D K N C D L . . D V A C R R I A W G K F M N S G Q T C V A P D Y I 250

Tb927.10.3210 Y V P Q S R W E E L K G Y L L E L H G K L K M G Q P . . . . . D D F Q S . . F M C A V I D . E T A F D R N K K Y I D I A K A D S S A Y T I 403  
Tb927.10.6190 F V H S T V Y G D F M T R L L E R V N S I R V G N N . . . . . F D P S S T M G A L V S S S . A V E R V V S L V Q . . D A V E K G A K V 373  
Tb927.6.4210 I V Q E S I H D R L L T I L E K R V R A L T Q G P A S V . . . . . G L Y D L G A M T M G E D A V R K I Q K L V D . . D S V D A G A T L 411  
TbALDH3 . . . . . V V E K S M E S V L V D A L A E A R K A M L G D K F L K V L K G E L L V K Q K Q F L E S D Y P R I V N . . . . . A S H F Q R L M E . . . F M A G G K V 334  
HsALDH3B1 . . . . . L C S P E M Q E R L L P A L Q S T I T R F Y G D D P . . . . . Q S S P N L G R I I N . . . . . Q K Q F Q R L R A . . . . . L L G C G R V 303  
HsALDH3B2 . . . . . L C S P E M Q E R L L P A L Q S T I T R F Y G D D P . . . . . Q S S P N L G H I I N . . . . . Q K Q F Q R L R A . . . . . L L G C S R V 222  
HsALDH3A2 . . . . . L C E A S L Q N Q I V K E T V K E F Y G E N I . . . . . K E S P D Y E R I I N . . . . . L R H F K R I L S . . . . . L L E G Q K I 300  
HsALDH3A1 . . . . . L C D P S I Q N Q I V E K L K K S L K E F Y G E D A . . . . . K K S R D Y G R I I S . . . . . A R H F Q R V M G . . . . . L I E G Q K V 303

Tb927.10.3210 I A G G G C D K S E G W F I Q P T I I V A K D P . N A Q L L R E E I F G P I L T V H V Y D D S K P D F W S E A C N L V N N A T K Y A L T G S I F A Q D R K 479  
Tb927.10.6190 E A G G R R L S G P G Y F F E P T V L S G V N H D . T M R C C Q E E I F G P I P I I T F D D D T E . . . . . A I R L . A N A T P A G L A A Y V Y T Q D Y R 444  
Tb927.6.4210 V C G G . . K G G . T S F F P P T I L T N V T P . S V P I A R E E V F G P V L V M M K F K T T D A E . . . . . A V E L . V N A C E Y G L G S S V F S S D I E 478  
TbALDH3 . . . . . A V G G E A D E A . T L T I A P T I L T N I D P . T H P V M Q E E I F G P I L P V L T Y E N E K D . . . . . I L K I . I N S R E K P L A L Y V F S N N K R 403  
HsALDH3B1 . . . . . A I G G Q S D E S . D R Y I A P T V L V D V Q E . M E P V M Q E E I F G P I L P I V N V Q S L D E . . . . . A I E F . I N R R E K P L A L Y A F S N S S Q 372  
HsALDH3B2 . . . . . A I G G Q S N E S . D R Y I A P T V L V D V Q E . T E P V M Q E E I F G P I L P I V N V Q S V D E . . . . . A I K F . I N R Q E K P L A L Y A F S N S S Q 291  
HsALDH3A2 . . . . . A F G G E T D E A . T R Y I A P T V L T D V D P . K T K V M Q E E I F G P I L P I V P V K N V D E . . . . . A I N F . I N E R E K P L A L Y V F S H N H K 369  
HsALDH3A1 . . . . . A Y G G T G D A A . T R Y I A P T I L T D V D P . Q S P V M Q E E I F G P V L P I V C V R S L E E . . . . . A I Q F . I N Q R E K P L A L Y M F S S N D K 372

Tb927.10.3210 A I R D A T E K H L R Y A A G N Y Y I N D K C T G A V V G Q Q P F G G A R A S G S N D K P G S A L F L T R W V S A R T I K E N . . F D H S A Q V . . S Y P 552  
Tb927.10.6190 R Q K Q I M E . . . Q L S F G M I G I N D S G L S S P C . . A P F G G V K E S G L G R D G S K Y G I D A F L D V K Y V L E S R V . . . . . 503  
Tb927.6.4210 R A K H I A D . . . Q L V T G M T N V N D F G I N Y L C Q S L P F G G V K I S G F D R F A G V E G L R . . . . . G N C V V R A S T T D R I P G V K T V I P 547  
TbALDH3 . . . . . F I R G V E S . . . R T S S G A V V N V N D V V H A G A D G L P F G G V G R S G M G A Y H G R Y S F E T F S H R R A C L R S P G M E K L N A L . . R Y P 475  
HsALDH3B1 . . . . . V V K R V L T . . . Q T S S G G F C G N D G F M H M T L A S L P F G G V G A S G M G R Y H G K F S F D T F S H H R A C L R S P G M E K L N A L . . R Y P 444  
HsALDH3B2 . . . . . V V N Q M L E . . . R T S S G S F G G N E G F T Y I S L L S V P F G G V G H S G M G R Y H G K F T F D T F S H H R T C L L A P S G L E K L K E I . . H Y P 363  
HsALDH3A2 . . . . . L I K R M I D . . . E T S S G G V T G N D V I M H F T L N S F P F G G V G S S G M G A Y H G K H S F D T F S H Q R P C L L K S L K R E G A N K L . . R Y P 441  
HsALDH3A1 . . . . . V I K K M I A . . . E T S S G G V A A N D V I V H I T L H S L P F G G V G N S G M G S Y H G K K S F E T F S H R R S C L V R P L M N D E G L K V . . R Y P 444

Tb927.10.3210 H Q L P D Y V T L . . . . . 561  
Tb927.10.6190 P V L Q Y P I S E A S F T F V E R L . . . . . T N V I Y G G W F A A V S . . . . . S V I E M M R M K . . . . . S A P R K K D S . . . . . 503  
Tb927.6.4210 P Y T T A K S R V L N S L L K P S A E V A . . . . . G A V G R S V W G V A A L A R V V E V G Y H Y M R F L M A G E T T P A P S S E P F S K S P R S N E 595  
TbALDH3 . . . . . P Q S P R R L R . . . . . M L L V A M E A Q G C S C T L L . . . . . 546  
HsALDH3B1 . . . . . P Y T D W N Q Q . . . . . L L R W G M G S Q S C T L L . . . . . 468  
HsALDH3B2 . . . . . P N S Q S K V D W G K F F L L K R F N K E K L G L L L L T F L G I V A A . . . . . V L V K A E Y Y . . . . . 385  
HsALDH3A2 . . . . . P S P A K M T Q H . . . . . 485  
HsALDH3A1 . . . . . P S P A K M T Q H . . . . . 453

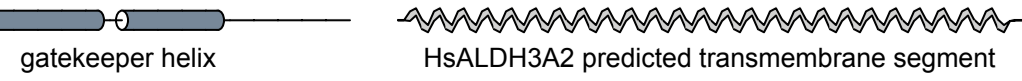

Supplement: ppat.1006850.s007.pdf [file ppat.1006850.s007.pdf]
