# Supplementary material for: Host-parasite co-metabolic activation of antitrypanosomal aminomethyl-benzoxaboroles
Source: PubMed Central journal article supplement (PMC5823473; doi:10.1371/journal.ppat.1006850), 2018-02-09
Supplement: ppat.1006850.s005.pdf [file ppat.1006850.s005.pdf]

TbALDH3 C<sub>259</sub>S  
+NAD +Mg<sup>2+</sup>

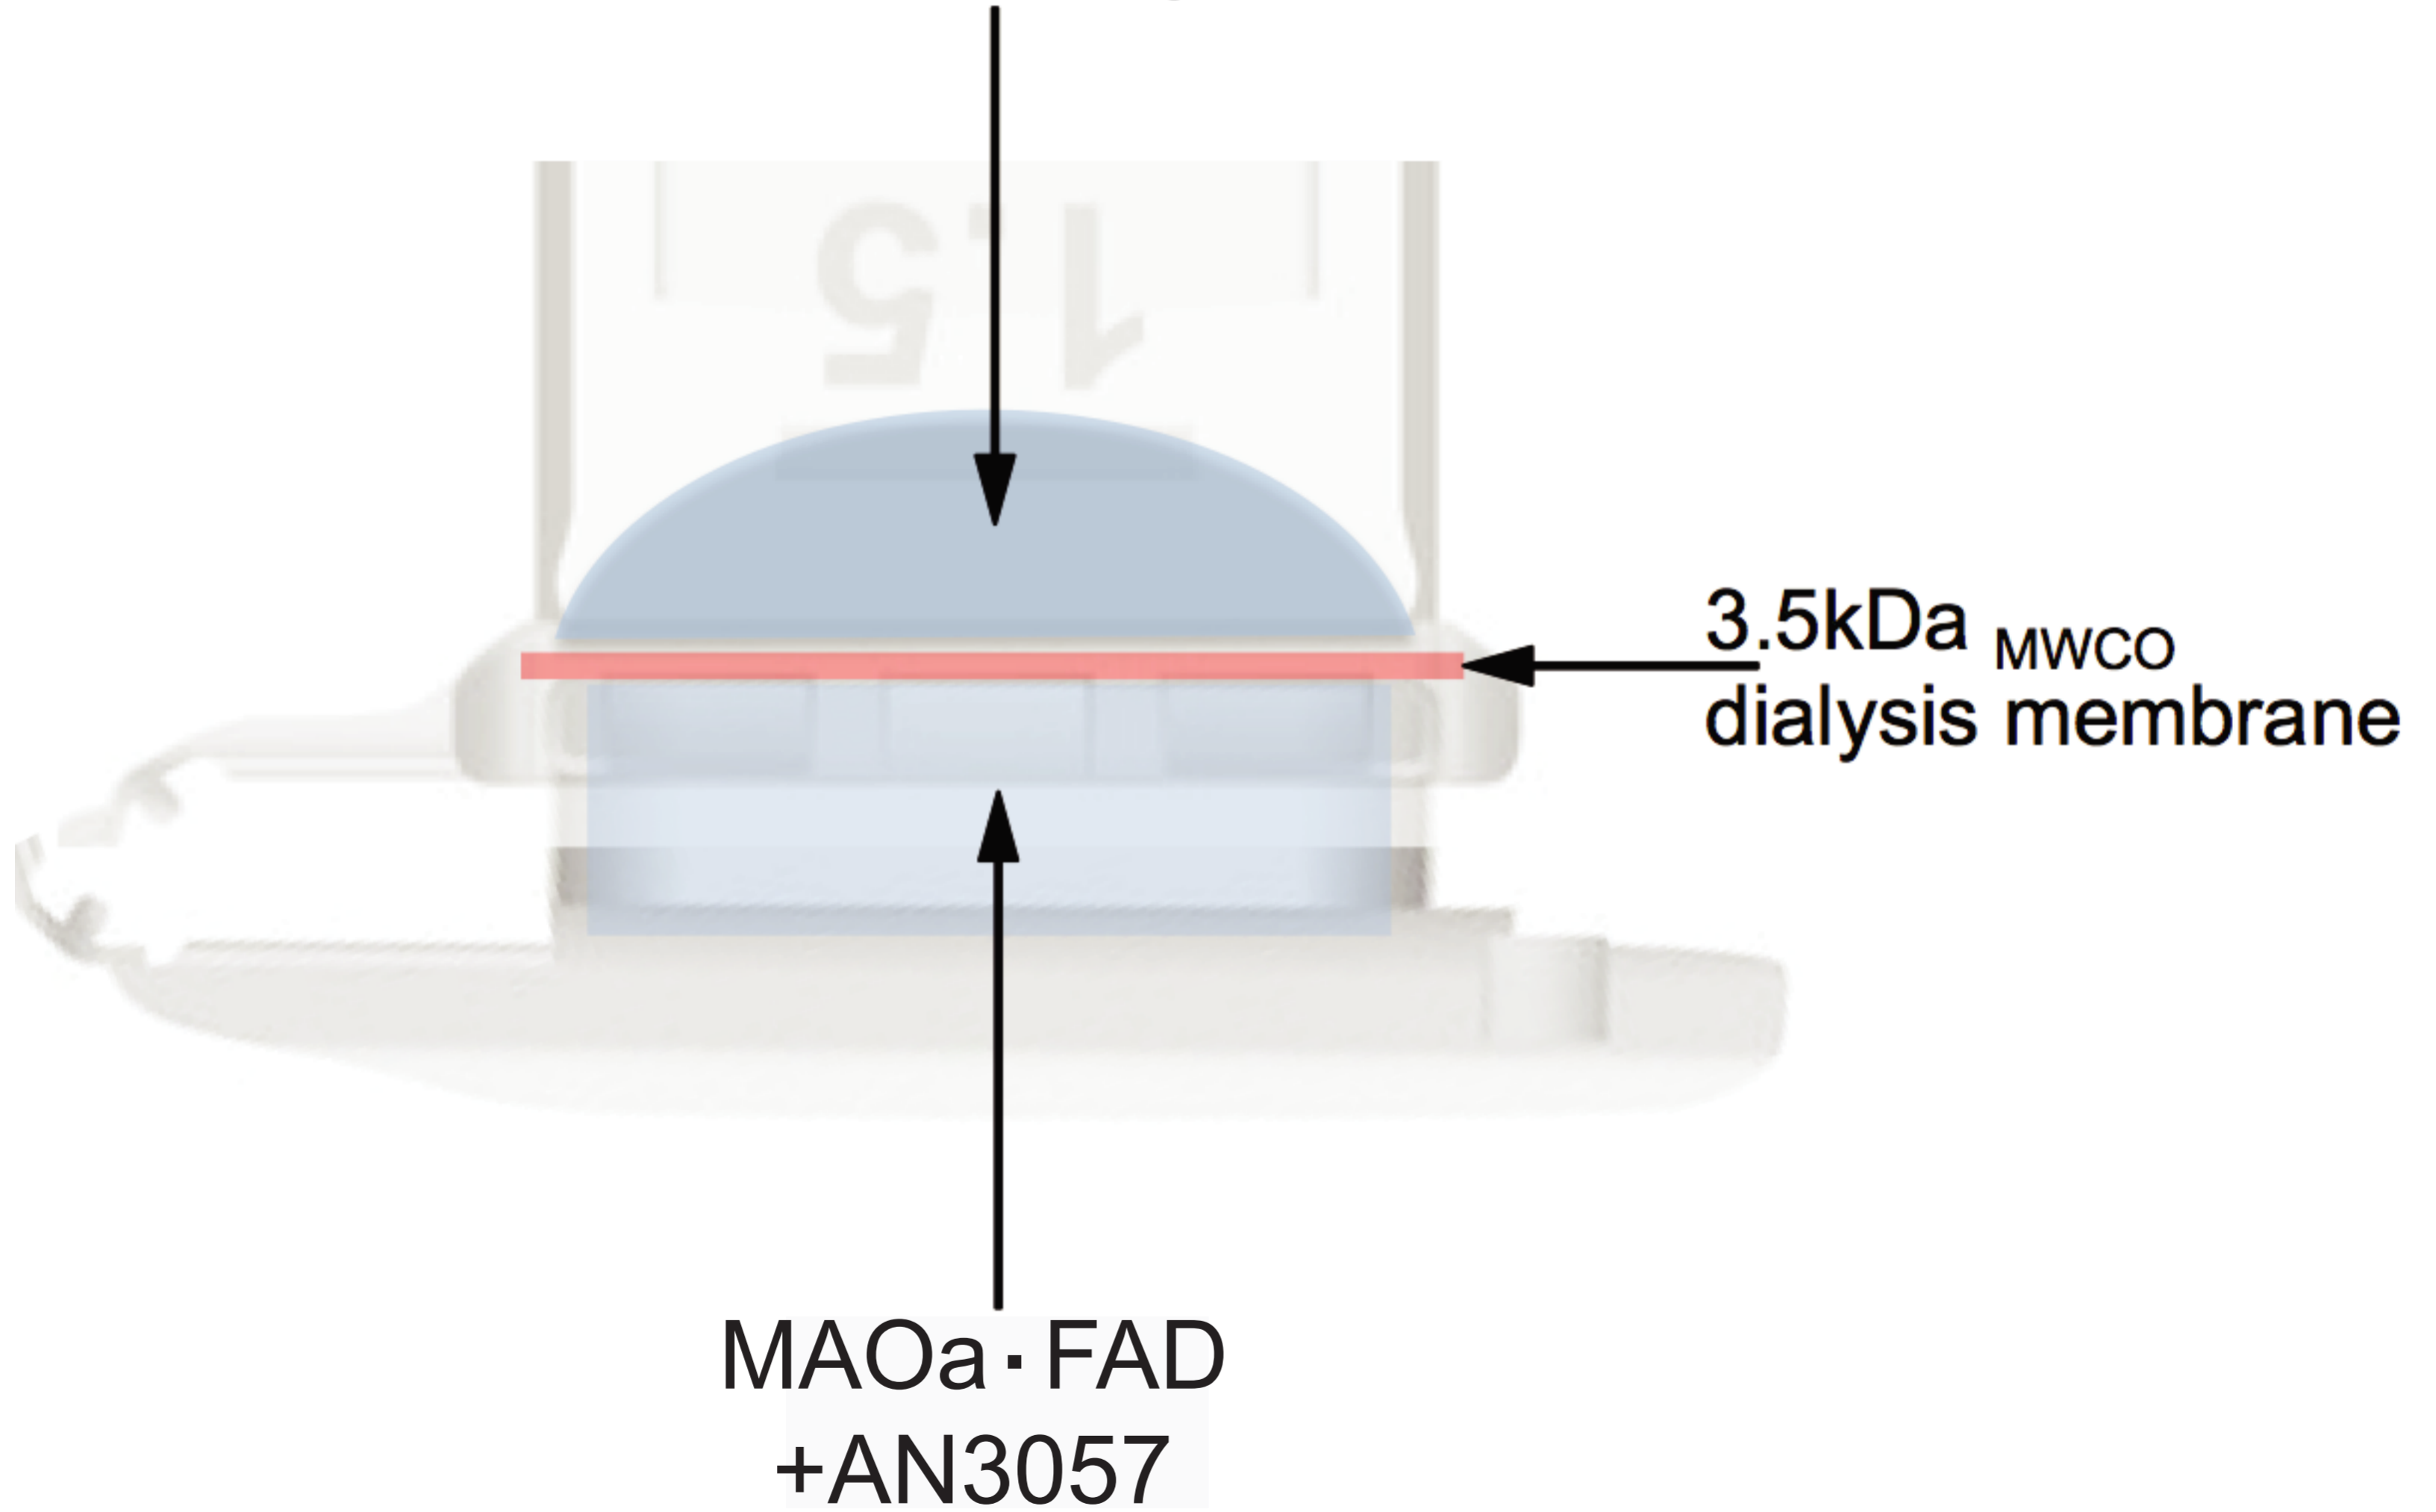

3.5kDa MWCO  
dialysis membrane

MAOa · FAD  
+AN3057
