# Supplementary material for: Host-parasite co-metabolic activation of antitrypanosomal aminomethyl-benzoxaboroles
Source: PubMed Central journal article supplement (PMC5823473; doi:10.1371/journal.ppat.1006850), 2018-02-09

**A**

AN3057

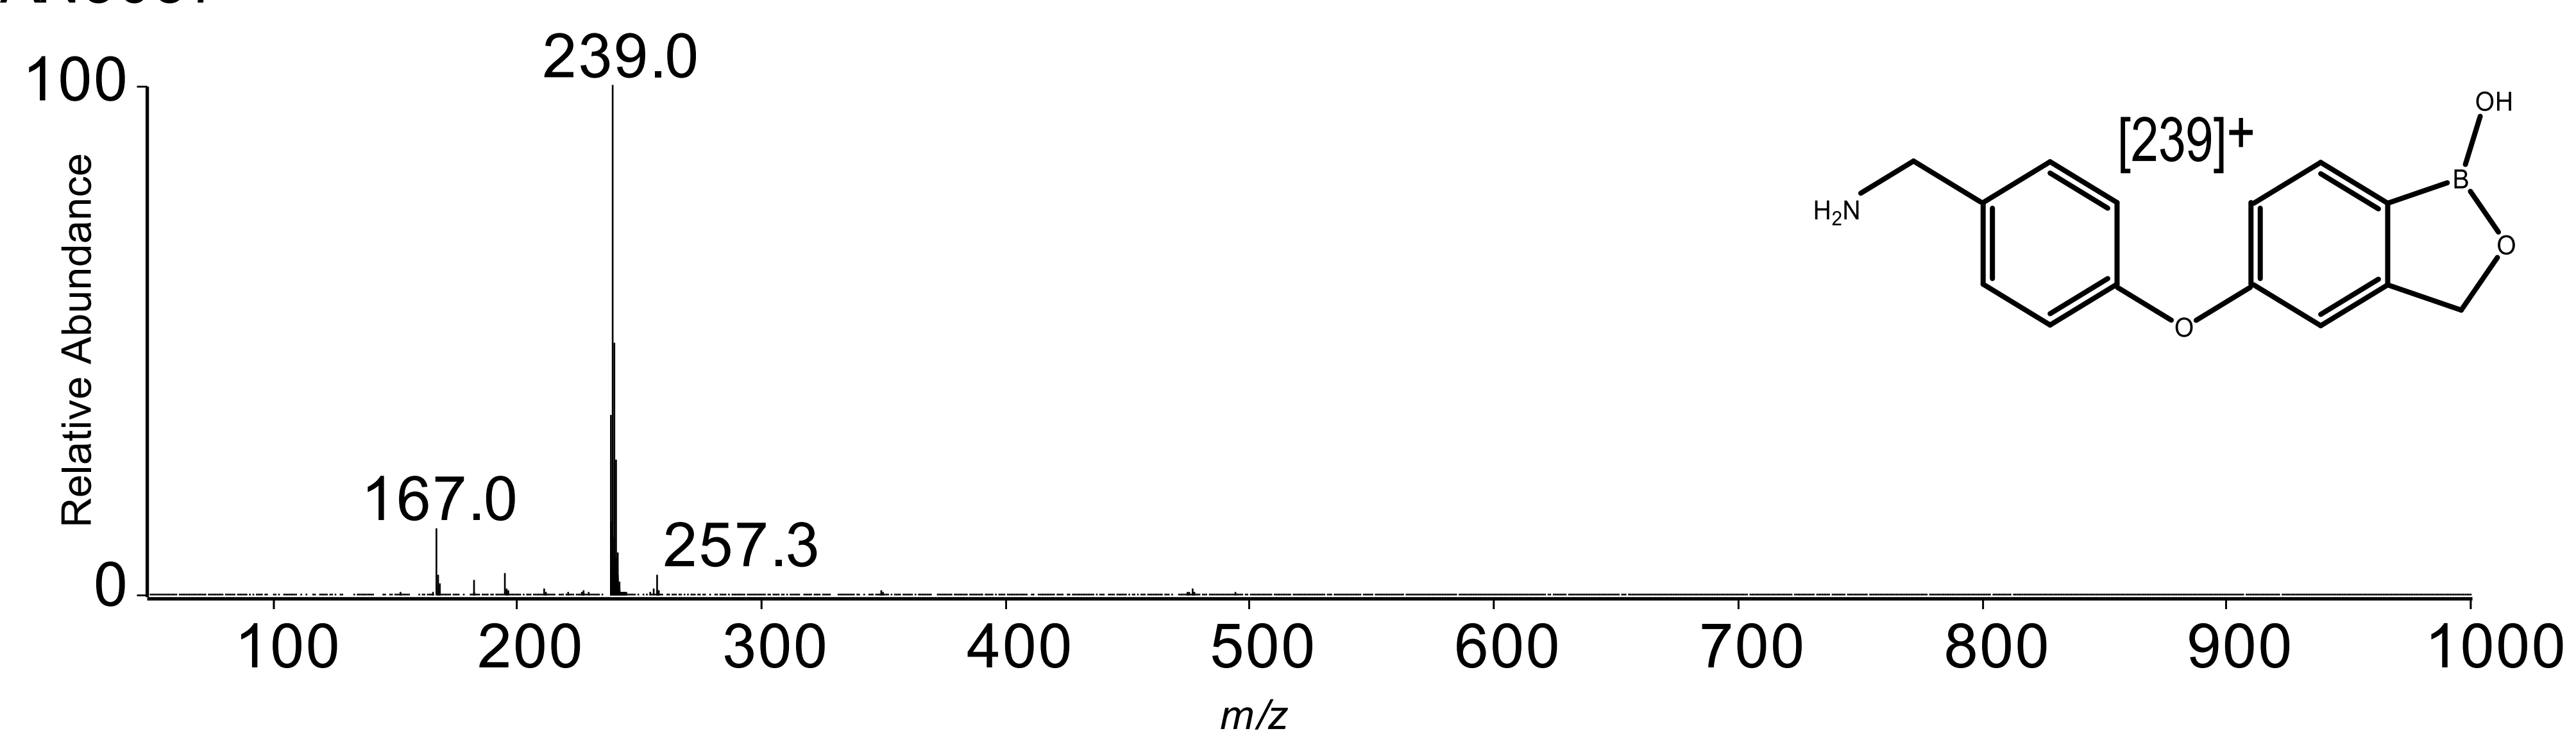

AN3057+TbALDH3

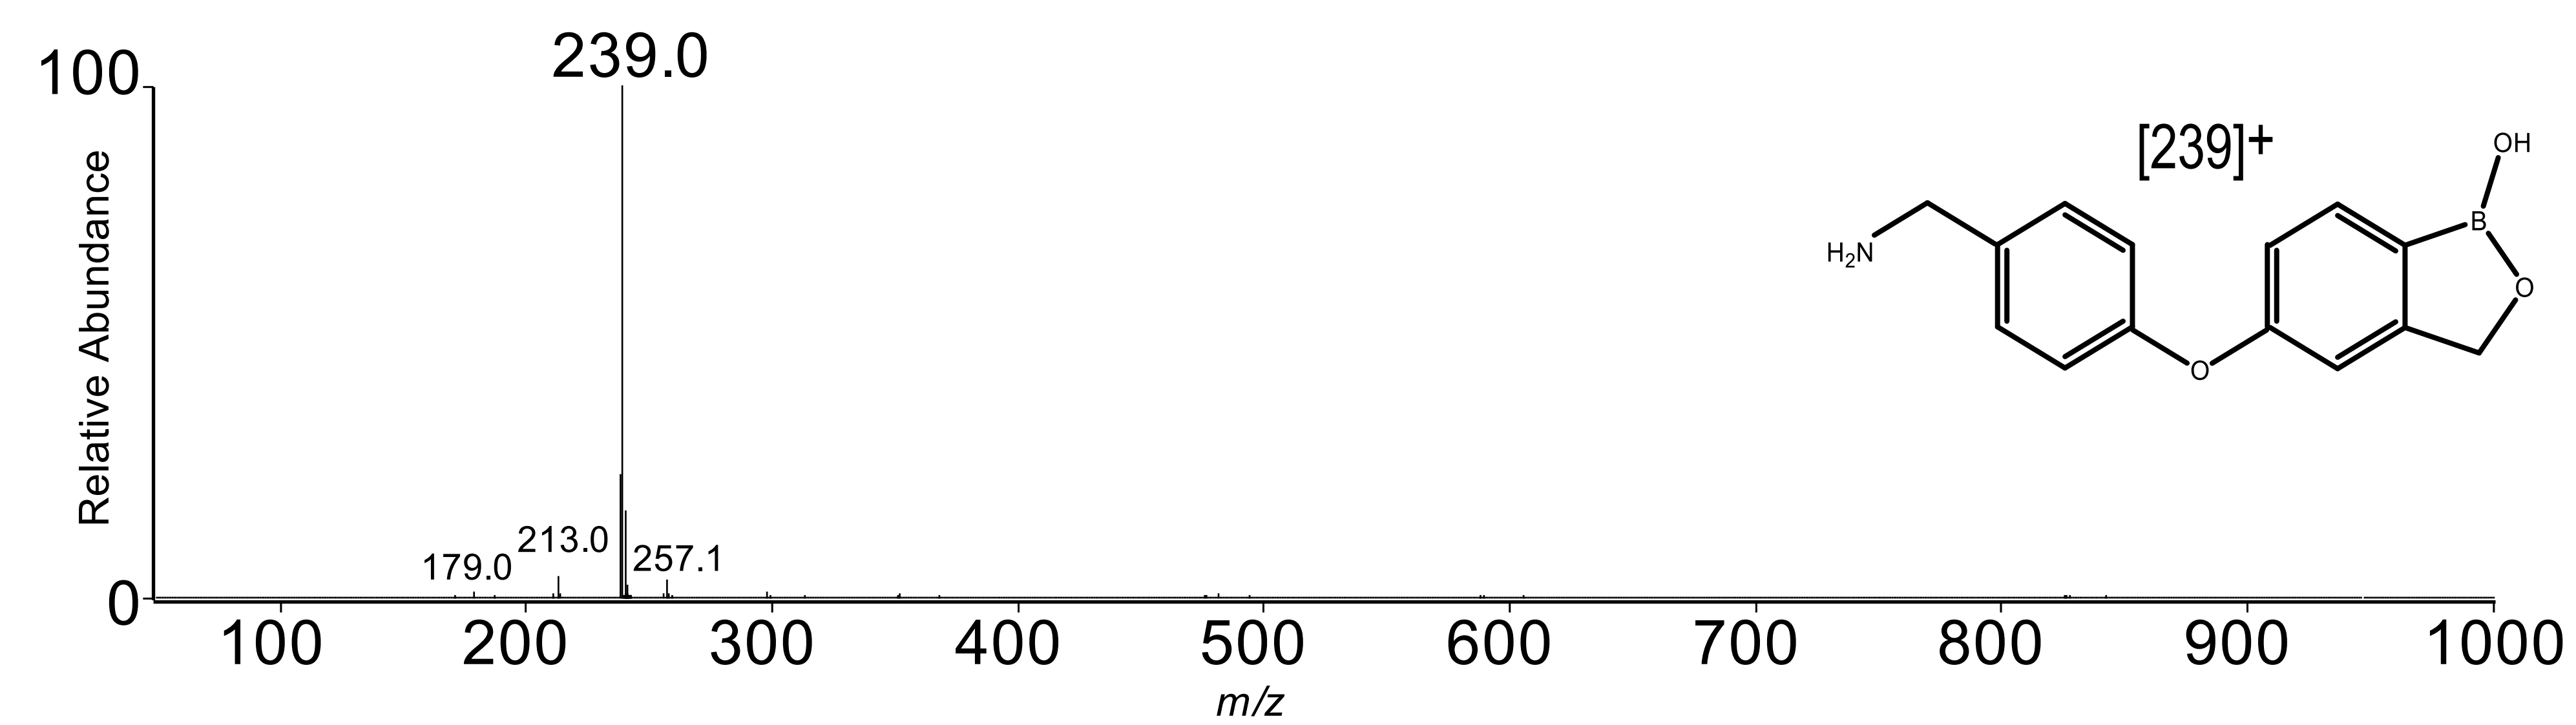**C**

AN3057+FBS (F1)

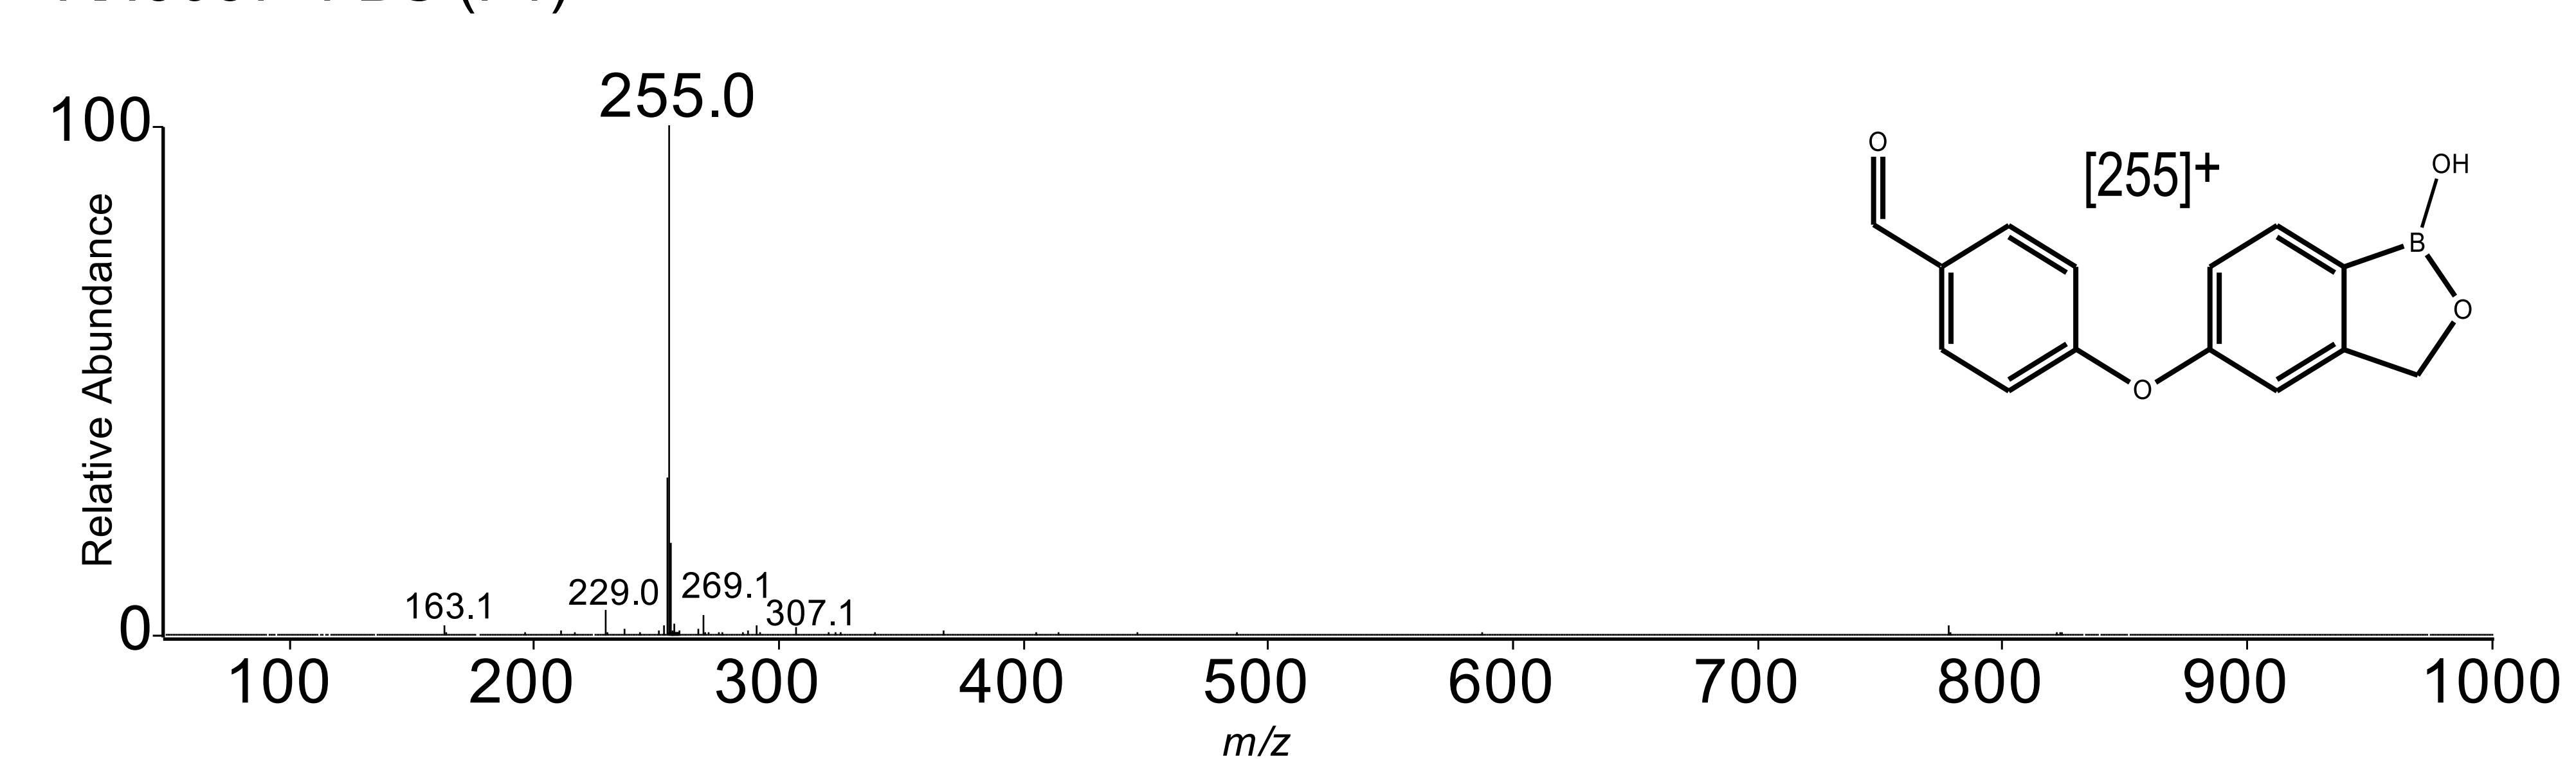

AN3057+FBS (F2)

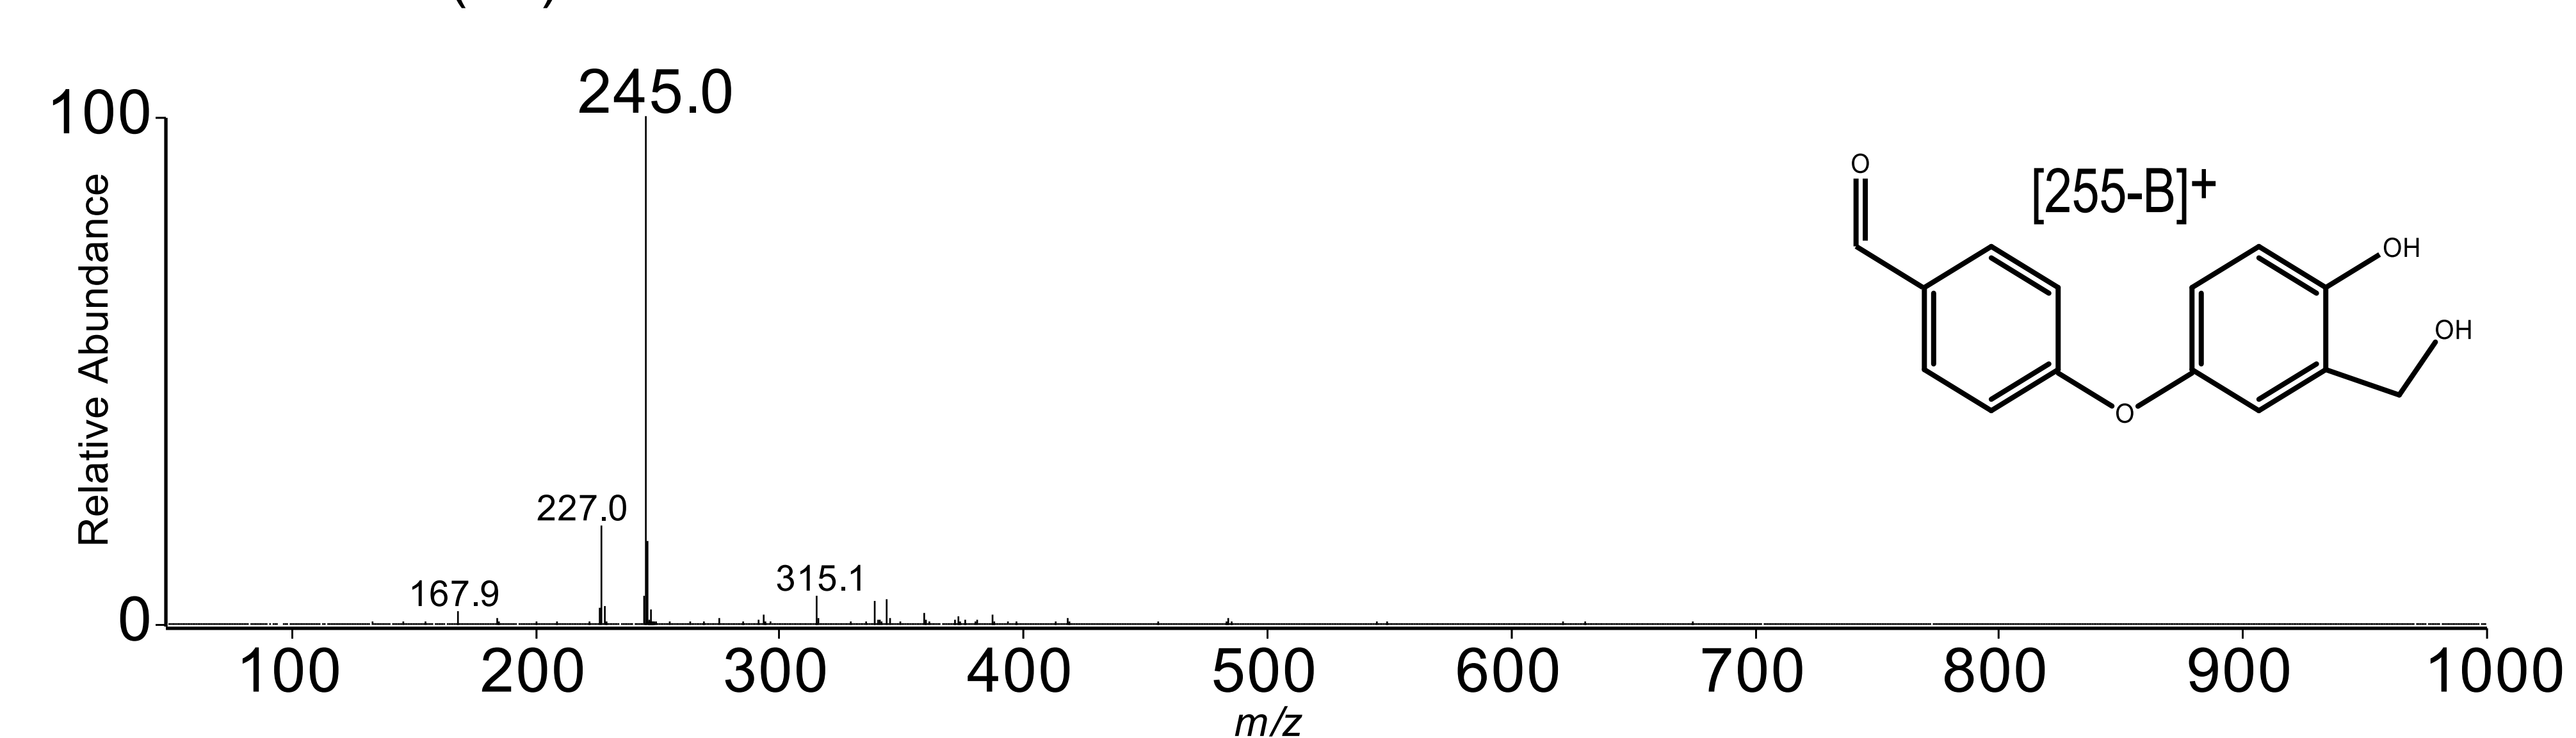

AN3057+FBS (F2)

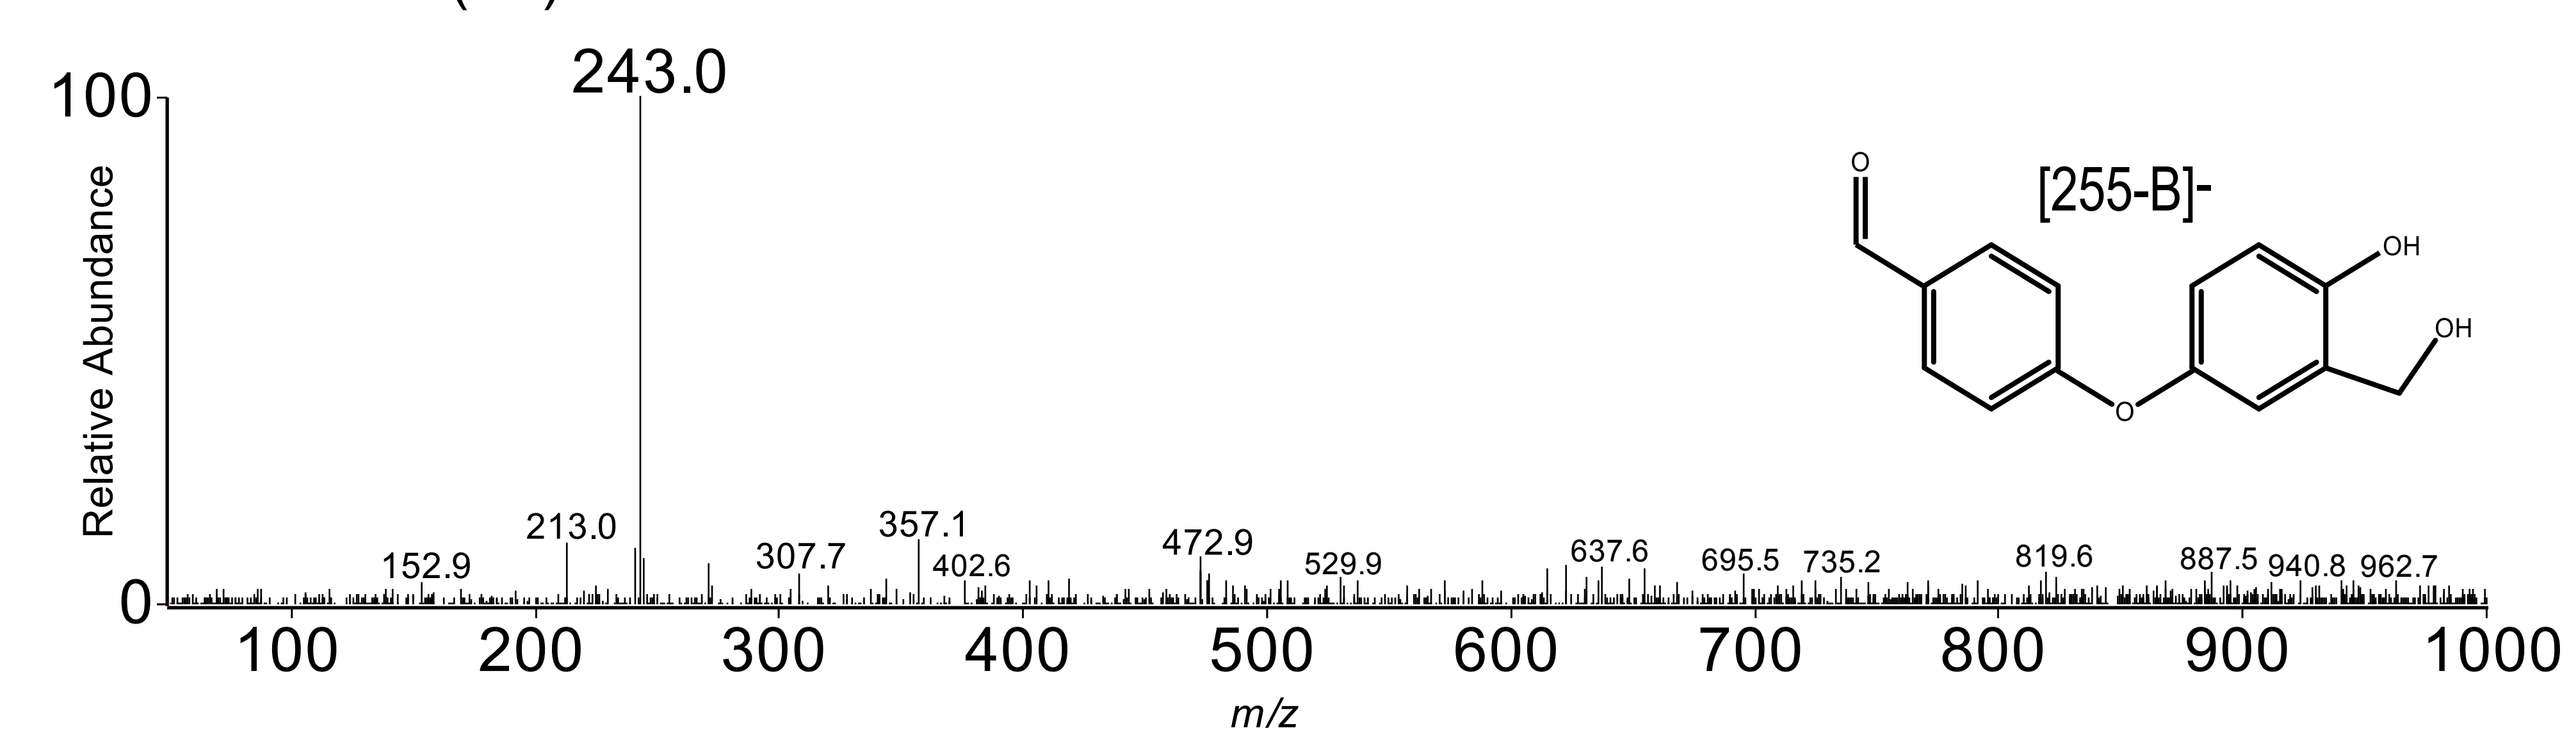**B**

AN2861

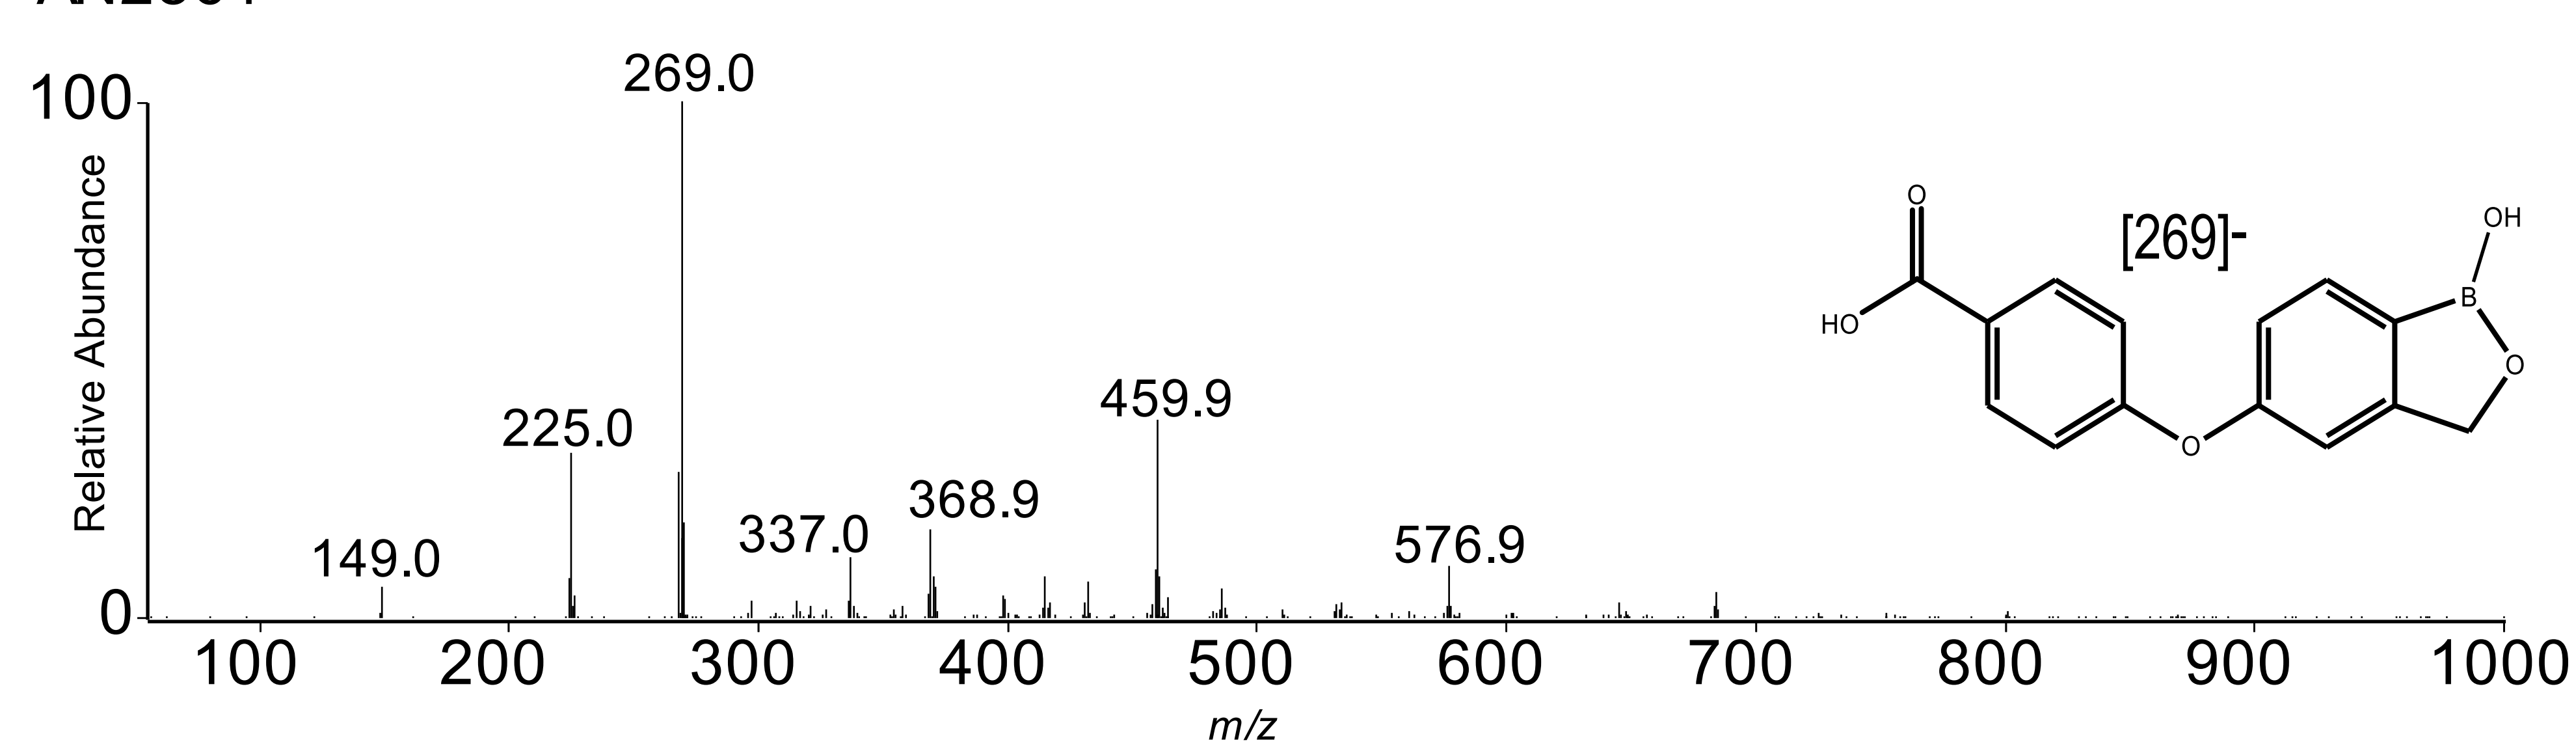

AN3057+FBS+TbALDH3 (F-A1)

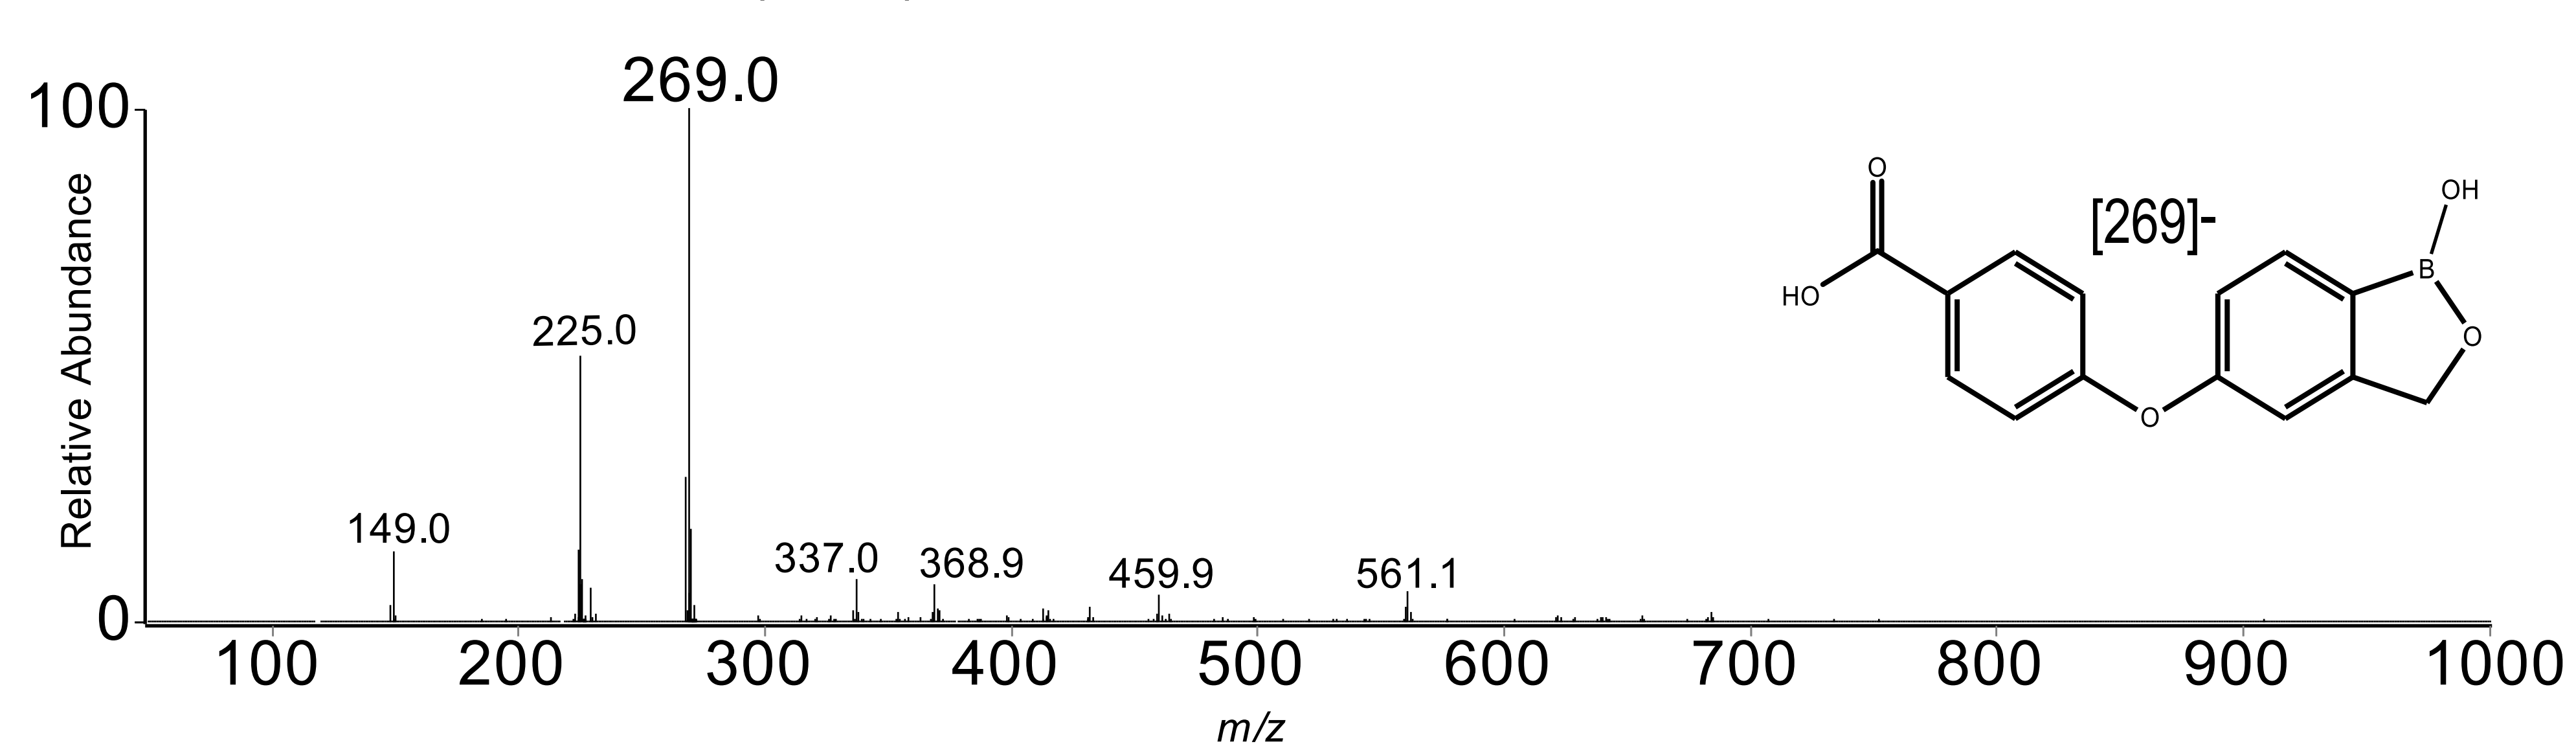

AN3057+FBS+TbALDH3 (F-A1)

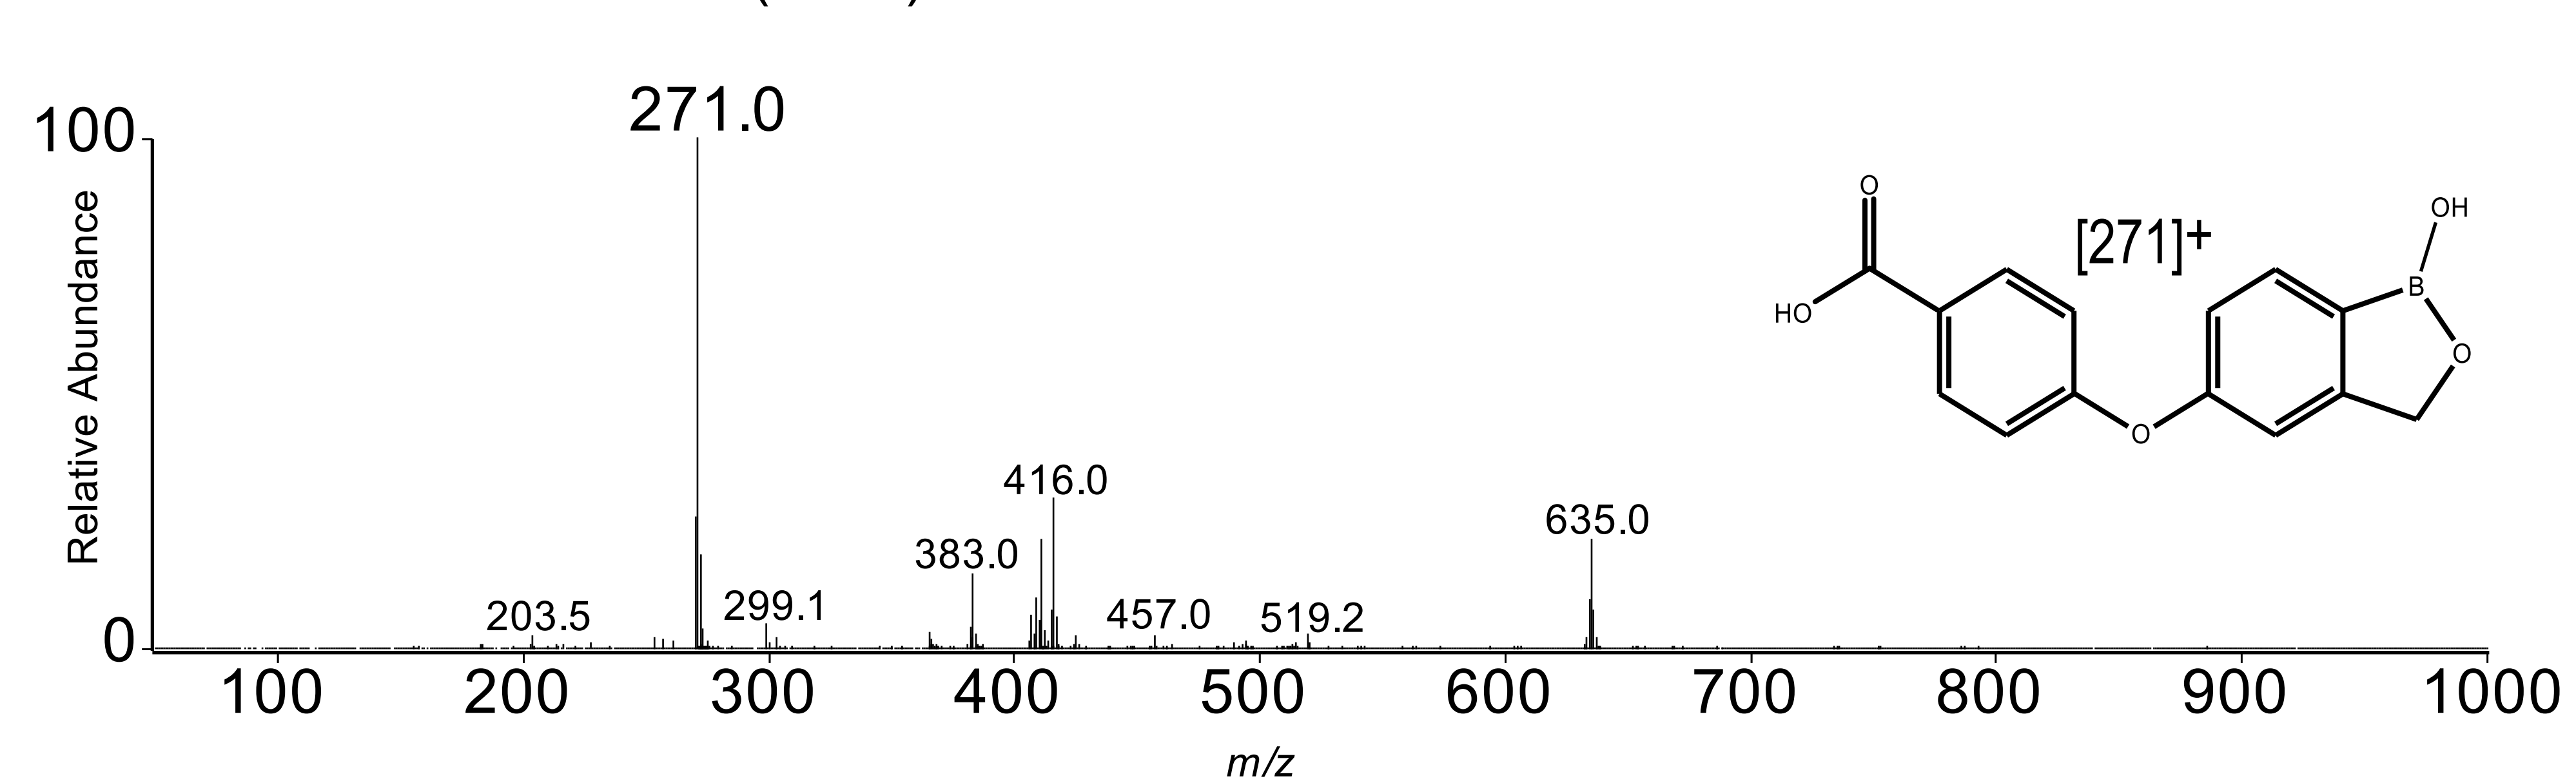

AN3057+FBS+TbALDH3 (F-A2)

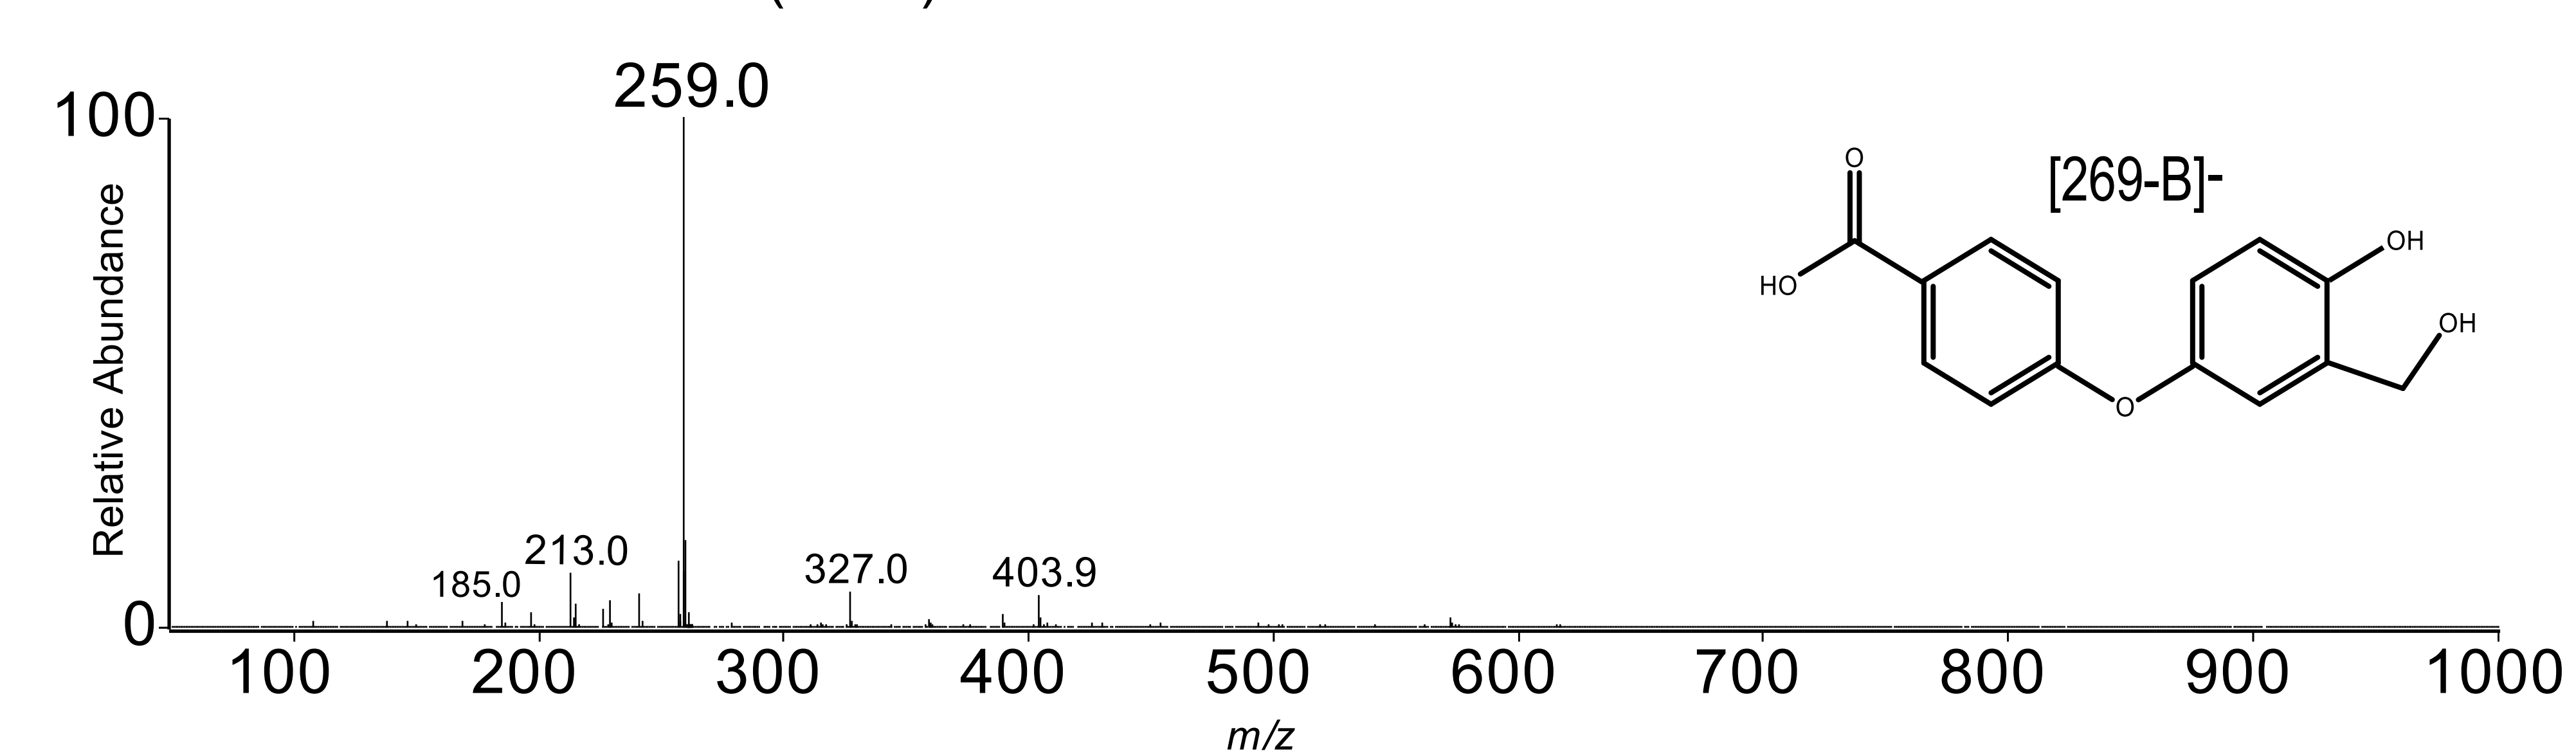

AN3057+FBS+TbALDH3 (F-A2)

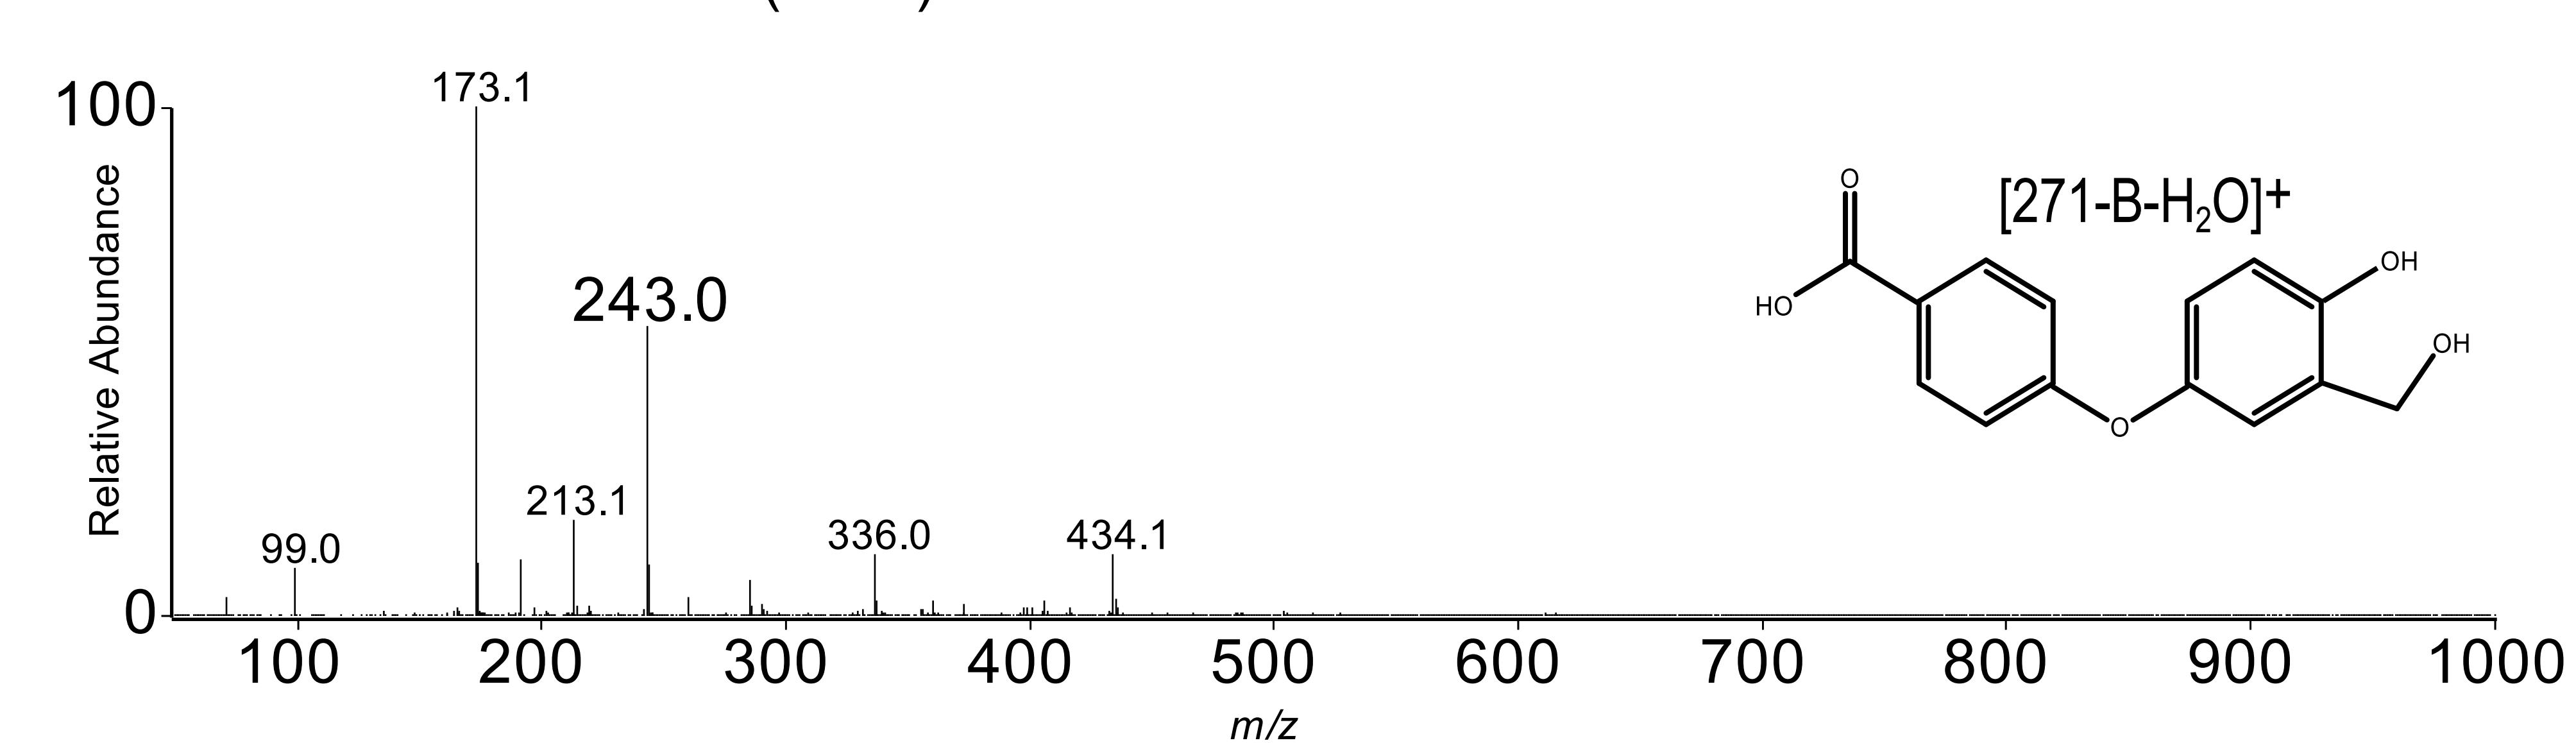

Supplement: ppat.1006850.s009.pdf [file ppat.1006850.s009.pdf]
