# Supplementary material for: Host-parasite co-metabolic activation of antitrypanosomal aminomethyl-benzoxaboroles
Source: PubMed Central journal article supplement (PMC5823473; doi:10.1371/journal.ppat.1006850), 2018-02-09

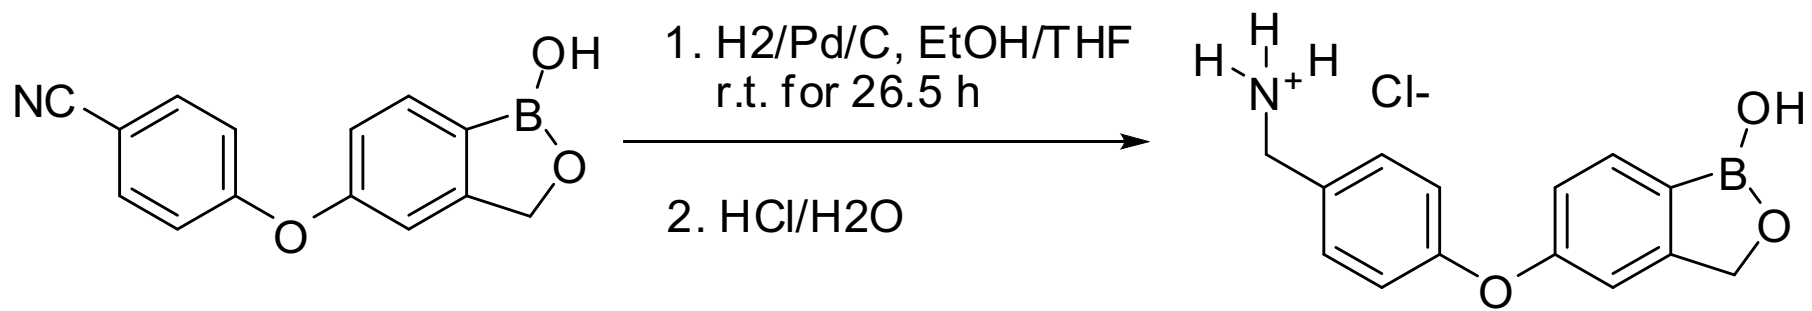

Supplement: ppat.1006850.s010.pdf [file ppat.1006850.s010.pdf]
