# Supplementary material for: Host-parasite co-metabolic activation of antitrypanosomal aminomethyl-benzoxaboroles
Source: PubMed Central journal article supplement (PMC5823473; doi:10.1371/journal.ppat.1006850), 2018-02-09
Supplement: ppat.1006850.s011.pdf [file ppat.1006850.s011.pdf]

S1 Table TbALDH3 crystallography and refinement statistics

| Dataset                                                             | 5MYP (wild type)                    | 5NNO (C259S)                          |
|---------------------------------------------------------------------|-------------------------------------|---------------------------------------|
| Spacegroup                                                          | <i>P</i> 12 <sub>1</sub> 1          | <i>P</i> 12 <sub>1</sub> 1            |
| Wavelength (Å)                                                      | 1.54178                             | 1.54178                               |
| Resolution (Å)                                                      | 90.70-1.95 (2.00-1.95) <sup>a</sup> | 46.56-2.50 (2.60-2.50) <sup>a</sup>   |
| Unit cell (Å)                                                       | 87.72 63.95 91.75                   | 89.17 62.52 92.97                     |
| Unique reflections                                                  | 72557 (4318)                        | 34306(3730)                           |
| Completeness (%)                                                    | 99.4 (95.9)                         | 97.6 (93.9)                           |
| $\langle I/s(I) \rangle$                                            | 10.1 (3.8)                          | 12.9 (8.0)                            |
| Multiplicity                                                        | 4.9 (3.5)                           | 3.1 (2.6)                             |
| $R_{\text{merge}}^b$                                                | 0.099 (0.213)                       | 0.074 (0.112)                         |
| $R_{\text{meas}}$                                                   | 0.111 (0.250)                       | 0.090 (0.138)                         |
| CC(1/2)                                                             | 0.993 (0.941)                       | 0.989 (0.968)                         |
| <b>Refined model</b>                                                |                                     |                                       |
| $R_{\text{work}}^c$                                                 | 0.20                                | 0.24                                  |
| $R_{\text{free}}^d$                                                 | 0.22                                | 0.28                                  |
| Protein residues                                                    | 973                                 | 978                                   |
| Other components                                                    | 520 water,<br>1 glycerol            | 200 water, 2 NAD,<br>2 AN3057aldehyde |
| rmsd from ideal geometry                                            |                                     |                                       |
| bond lengths (Å)                                                    | 0.007                               | 0.011                                 |
| bond angles (°)                                                     | 1.01                                | 1.55                                  |
| Thermal parameter ( <i>B</i> ) values (Å <sup>2</sup> )             |                                     |                                       |
| From Wilson plot                                                    | 14.8                                | 10.8                                  |
| Mean <i>B</i> over all atoms                                        | 19.0                                | 11.6                                  |
| Mean <i>B</i> over all atoms for protein/waters/NAD/AN3057 aldehyde | 19.1/23.6/35.0                      | 26.2/14.4/21.5/27.1                   |
| Ramachandran favoured/allowed/outliers (%)                          | 98.2 /1.2 /0.4                      | 97.5/2.3/0.2                          |

**a.** Values in parentheses refer to the highest resolution bin; **b.**  $R_{\text{merge}} = \frac{\sum h \sum i |I(h,i) - \langle I(h) \rangle|}{\sum h \sum i I(h,i)}$ ; **c.**  $R_{\text{work}} = \frac{\sum hkl ||F_o| - |F_c||}{\sum |F_o|}$ , where  $F_o$  is the observed structure factor amplitude and the  $F_c$  is the structure-factor amplitude calculated from the model; **d.**  $R_{\text{free}}$  is the same as  $R_{\text{work}}$  except only calculated using a subset, 5%, of the data that are not included in any refinement calculations.
