# Supplementary material for: Host-parasite co-metabolic activation of antitrypanosomal aminomethyl-benzoxaboroles
Source: PubMed Central journal article supplement (PMC5823473; doi:10.1371/journal.ppat.1006850), 2018-02-09
Supplement: ppat.1006850.s013.pdf [file ppat.1006850.s013.pdf]

S3 Table Metabolism profiles of *T. brucei* with the treatment of different benzoxaboroles

| Metabolite           | AN3057 LogFC (adj p value) | AN5568 LogFC (adj p value) |
|----------------------|----------------------------|----------------------------|
| S-adenosylmethionine | 2.36 (0.0011)              | 2.68 (0.0018)              |
| Methylthioadenosine  | 2.87 (0.00044)             | 3.29                       |
| Methionine           | 0.2                        | -0.04                      |
| Adenine              | 1.36 (0.0087)              | 2.55 (0.0018)              |
| Methyllysine         | 0.74                       | 0.85                       |
| Dimethyllysine       | 0.6                        | 1.08                       |
| Trimethyllysine      | 0.96                       | 1.83 (0.03)                |

Note: The log<sub>2</sub> fold change (LogFC) compared to time-matched DMSO control for each metabolite is shown. For metabolites with significant differences (adjusted p value of less than 0.05), the p-value is also shown adjusted by Benjamini-Hochberg procedure.
