# Supplementary material for: Host-parasite co-metabolic activation of antitrypanosomal aminomethyl-benzoxaboroles
Source: PubMed Central journal article supplement (PMC5823473; doi:10.1371/journal.ppat.1006850), 2018-02-09
Supplement: ppat.1006850.s014.pdf [file ppat.1006850.s014.pdf]

S4 Table Primers and constructs used in the work

| Strain       | Gene ID      | Construct         | Primer-Forward                                |
|--------------|--------------|-------------------|-----------------------------------------------|
| TbALDH3 RNAi | Tb927.6.3050 | pRPaiSL TbALDH3   | 5'-GTACGGATCCTCTAGACCAGTGATGCAGGAGGAAAT-3'    |
| TbALDH3-6Myc | Tb927.6.3050 | pNAT-TbALDH3-6Myc | 5'-GATCTCTAGAATGCCAGCAGGTGTTCCGGAG-3'         |
| TbALDH3      | Tb927.6.3050 | pET27bTbALDH3     | 5'-GCGCCCATGGCACCAGCAGGTGTTCCGGAGAATACC-3'    |
| TbALDH3C256S | Tb927.6.3050 | pET27bTbALDH3     | 5'-TCAACGCAGGTCAAACATCTATAGCGCCTGATTACGTTG-3' |
