# Supplementary material for: Host-parasite co-metabolic activation of antitrypanosomal aminomethyl-benzoxaboroles
Source: PubMed Central journal article supplement (PMC5823473; doi:10.1371/journal.ppat.1006850), 2018-02-09
Supplement: ppat.1006850.s015.pdf [file ppat.1006850.s015.pdf]

S5 Table Species, strains and protein acessions included in t

| <b>Species</b>                        | <b>Strain</b>      |
|---------------------------------------|--------------------|
| <i>Drosophila melanogaster</i>        | Release 6 ISO1     |
| <i>Caenorhabditis elegans</i>         | Bristol            |
| <i>Batrachochytrium dendrobatidis</i> | JAM                |
| <i>Aspergillus nidulans</i>           | FGS                |
| <i>Saccharomyces cerevisiae</i>       | ATCC 204508/S2     |
| <i>Schizosaccharomices pombe</i>      | 972/ATCC 24        |
| <i>Leishmania braziliensis</i>        | MHOM/BR/75/M2904   |
| <i>Leishmania donovani</i>            | BPK28A1            |
| <i>Leishmania infantum</i>            | JPCM5              |
| <i>Leishmania major</i>               | Friedlin           |
| <i>Leishmania mexicana</i>            | MHOM/GT/2001/U1103 |
| <i>Leishmania tarentolae</i>          | Parrot-Tarll       |
| <i>Leptomonas pyrrhocoris</i>         | H10                |
| <i>Trypanosoma brucei</i>             | TREU927            |
| <i>Trypanosoma vivax</i>              | Y486               |
| <i>Trypanosoma congolense</i>         | IL3000             |
| <i>Trypanosoma evansi</i>             | STIB805            |
| <i>Trypanosoma cruzi</i> Sylvo        | X10/1              |
| <i>Trypanosoma grayi</i>              | ANR4               |
| <i>Trypanosoma rangeli</i>            | SC58               |

ued in the phylogenetic analyses

| <b>Protein</b> | <b>Uniprot ID</b> |
|----------------|-------------------|
| ALDH1A1        | P00352            |
| ALDH1A2        | O94788            |
| ALDH1A3        | P47895            |
| ALDH1B1        | P30837            |
| ALDH1L1        | O75891            |
| ALDH1L2        | Q3SY69            |
| ALDH2          | P05091            |
| ALDH3A1        | P30838            |
| ALDH3A2        | P51648            |
| ALDH3B1        | P43353            |
| ALDH3B2        | P48448            |
| ALDH4A1        | P30038            |
| ALDH5A1        | P51649            |
| ALDH6A1        | Q02252            |
| ALDH7A1        | P49419            |
| ALDH8A1        | Q9H2A2            |
| ALDH9A1        | P49189            |
| ALDH16A        | Q8IZ83            |
| ALDH18A1       | P54886            |
